# Supplementary material for: Highly selective colorimetric and fluorescent BODIPY dyes for sensing of cysteine and/or homocysteine
Source: Royal Society of Chemistry journal article supplement (doi:10.1039/c5nj02346g), 2015-11-20
Supplement: c5nj02346g1.pdf [file c5nj02346g1.pdf]

*New Journal of Chemistry*

*Supporting information for*

# Highly Selective Colorimetric and Fluorescent BODIPY Dyes for Sensing of Cysteine and/or Homocysteine

*Qinghua Wu, Jinyuan Zhou, Yangchun Wu, Changjiang Yu, Erhong Hao\* and*

*Lijuan Jiao\**

Laboratory of Functionalized Molecular Solids, Ministry of Education, and Anhui Key Laboratory of Molecular Based Materials, College of Chemistry and Material Science, Anhui Normal University, Wuhu, 241000, China.

\*To whom correspondence should be addressed. E-mail: [haoehong@ahnu.edu.cn](mailto:haoehong@ahnu.edu.cn), [jiao421@ahnu.edu.cn](mailto:jiao421@ahnu.edu.cn)

## **Contents:**

|                                                                                                                       |            |
|-----------------------------------------------------------------------------------------------------------------------|------------|
| <b>1. Experimental Section.....</b>                                                                                   | <b>S2</b>  |
| <b>2. UV-vis and fluorescence spectroscopies.....</b>                                                                 | <b>S3</b>  |
| <b>3. Copies of <sup>1</sup>H NMR, <sup>13</sup>C NMR and High resolution mass spectra for all new compounds.....</b> | <b>S8</b>  |
| <b>4. DFT calculation.....</b>                                                                                        | <b>S16</b> |

## 1. Experimental Section:

Relative fluorescence quantum efficiencies of BODIPY derivatives were obtained by comparing the areas under the corrected emission spectrum of the test sample in various solvents with fluorescein ( $\lambda_{\text{ex}} = 480 \text{ nm}$ ) in 0.1 M NaOH aqueous solution ( $\Phi = 0.90$ ) as the standard or Cresyl Violet perchlorate ( $\lambda_{\text{ex}} = 540 \text{ nm}$ ) in methanol as the standard ( $\Phi = 0.54$ ). Non-degassed, spectroscopic grade solvents and a 10 mm quartz cuvette were used. Dilute solutions ( $0.01 < A < 0.05$ ) were used to minimize the reabsorption effects. Quantum yields were determined using the following equation:

$$\Phi_X = \Phi_S (I_X/I_S) (A_S/A_X) (n_X/n_S)^2$$

Where  $\Phi_S$  stands for the reported quantum yield of the standard, I stands for the integrated emission spectra, A stands for the absorbance at the excitation wavelength and n stands for the refractive index of the solvent being used.

## 2. UV-vis and fluorescence spectroscopies

**Table S1.** Photophysical properties of BODIPYs **1-4** in methanol at room temperature.

| BODIPY   | $\lambda_{\text{abs}}$ (nm), | $\lambda_{\text{em}}$ (nm) | $\Phi^{\text{a}}$ | Stokes-shift ( $\text{cm}^{-1}$ ) |
|----------|------------------------------|----------------------------|-------------------|-----------------------------------|
| <b>1</b> | 504                          | 530                        | 0.75              | 973                               |
| <b>2</b> | 508                          | 531                        | 0.95              | 852                               |
| <b>3</b> | 495                          | 555                        | 0.10              | 2184                              |
| <b>4</b> | 516                          | 532                        | 0.91              | 583                               |

<sup>a</sup>the fluorescence quantum yields  $\Phi$  were calculated using fluorescein ( $\lambda_{\text{ex}} = 480$  nm) in 0.1 M NaOH aqueous solution ( $\Phi = 0.90$ ) as the standard.

**Table S2.** Photophysical properties of BODIPYs **1** and **3** with or without various amino acids in MeOH/HEPES (45 mM, pH = 7.2, v/v = 1/1) solution.

| BODIPY                                  | $\lambda_{\text{abs}}$ (nm), | $\lambda_{\text{em}}$ (nm) | $\Phi^{\text{a}}$ | Stokes-shift (nm) |
|-----------------------------------------|------------------------------|----------------------------|-------------------|-------------------|
| <b>1</b>                                | 501                          | 530                        | 0.61              | 19                |
| <b>1-Cys<sup>b</sup></b>                | 516                          | 528                        | 0.08              | 12                |
| <b>1-Hcy<sup>b</sup></b>                | 514                          | 527                        | 0.16              | 13                |
| <b>1-other all analytes<sup>c</sup></b> | 516                          | 528                        | 0.08              | 12                |
| <b>3</b>                                | 491                          | 545                        | 0.09              | 54                |
| <b>3-Cys<sup>d</sup></b>                | 516                          | 547                        | 0.26              | 31                |
| <b>3-other all analytes<sup>e</sup></b> | 491                          | 545                        | 0.09              | 54                |

<sup>a</sup>the fluorescence quantum yields  $\Phi$  were calculated using fluorescein ( $\lambda_{\text{ex}} = 480$  nm) in 0.1 M NaOH aqueous solution ( $\Phi = 0.90$ ) as the standard and were recorded 1h after adding amino acids; <sup>b</sup> 200 equiv Cys or Hcy was added; <sup>c</sup>Other all analytes (400 equiv, respectively): Ala, Arg, Asp, Glu, Gly, His, Leu, Lys, Met, Pro, Ser, Thr, Val, Iso, and GHS; <sup>d</sup>400 equiv Cys was added; <sup>e</sup>Other all analytes (400 equiv, respectively): Hcy, Ala, Arg, Asp, Glu, Gly, His, Leu, Lys, Met, Pro, Ser, Thr, Val, Iso, and GHS

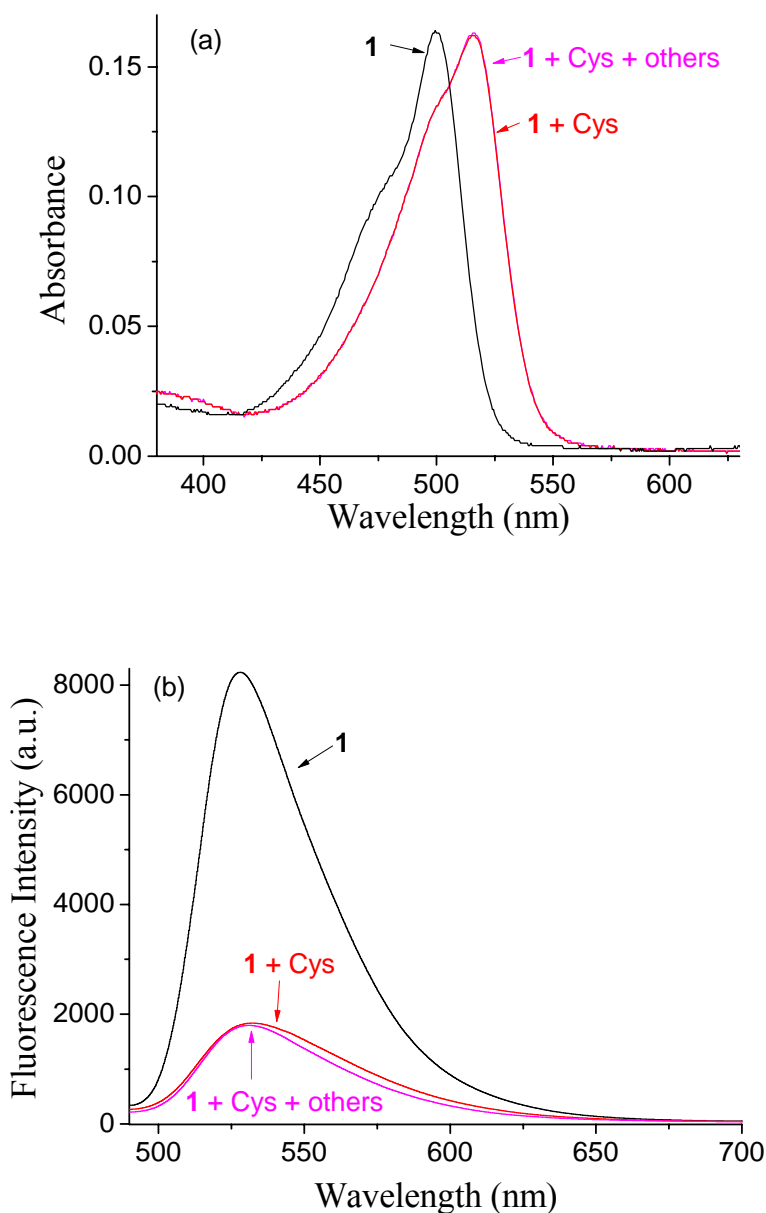

**Figure S1.** Absorption (a,  $1 \times 10^{-5}$  M) and fluorescence (b,  $1 \times 10^{-6}$  M,  $\lambda_{\text{ex}} = 480$  nm) spectra of BODIPY **1** in a MeOH/HEPES (45 mM, pH 7.2, 1:1, v/v) solution in the absence, or presence of 200 equiv of Cys or/and 400 equiv of other selected analytes (Ala, Arg, Asp, Glu, Gly, His, Leu, Lys, Met, Pro, Ser, Thr, Val, Iso, and GHS).

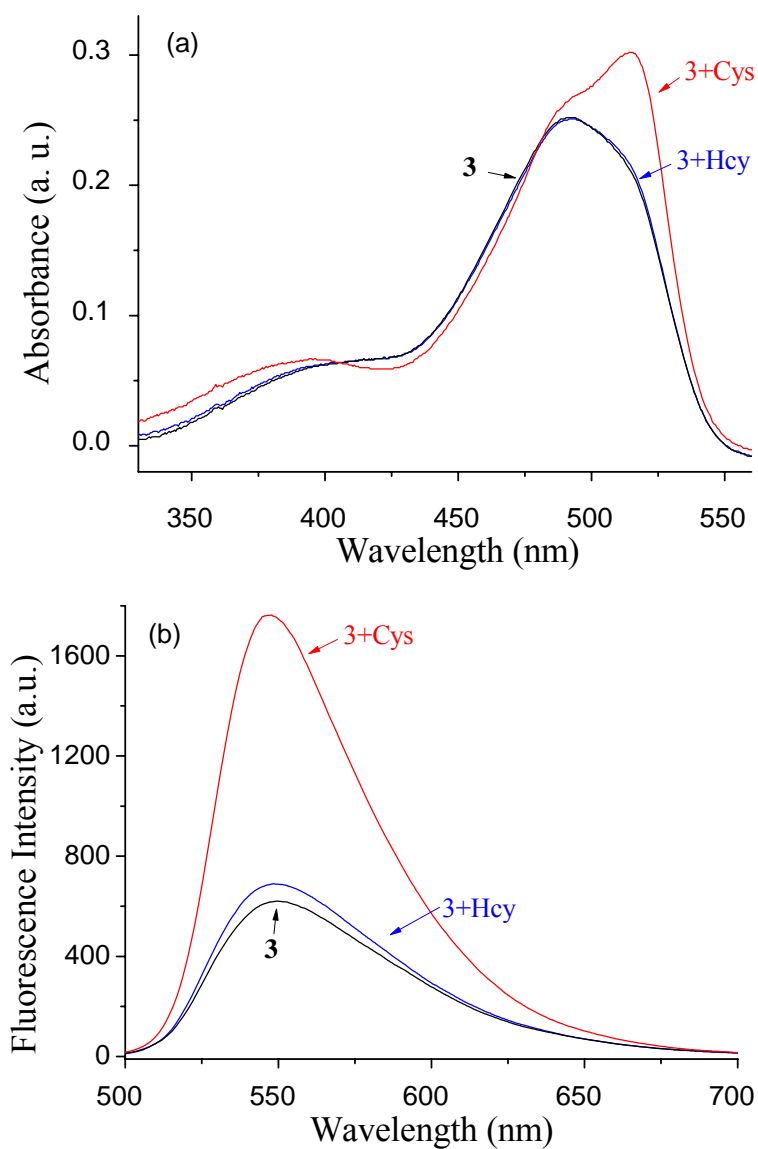

**Figure S2.** Absorption (a,  $1 \times 10^{-5}$  M) and emission (b,  $1 \times 10^{-6}$  M,  $\lambda_{\text{ex}} = 480$  nm) spectra of BODIPY **3** with or without 200 equiv of Cys or Hcy in a MeOH/HEPES (45 mM, pH 7.2, 1:1, v/v) solution.

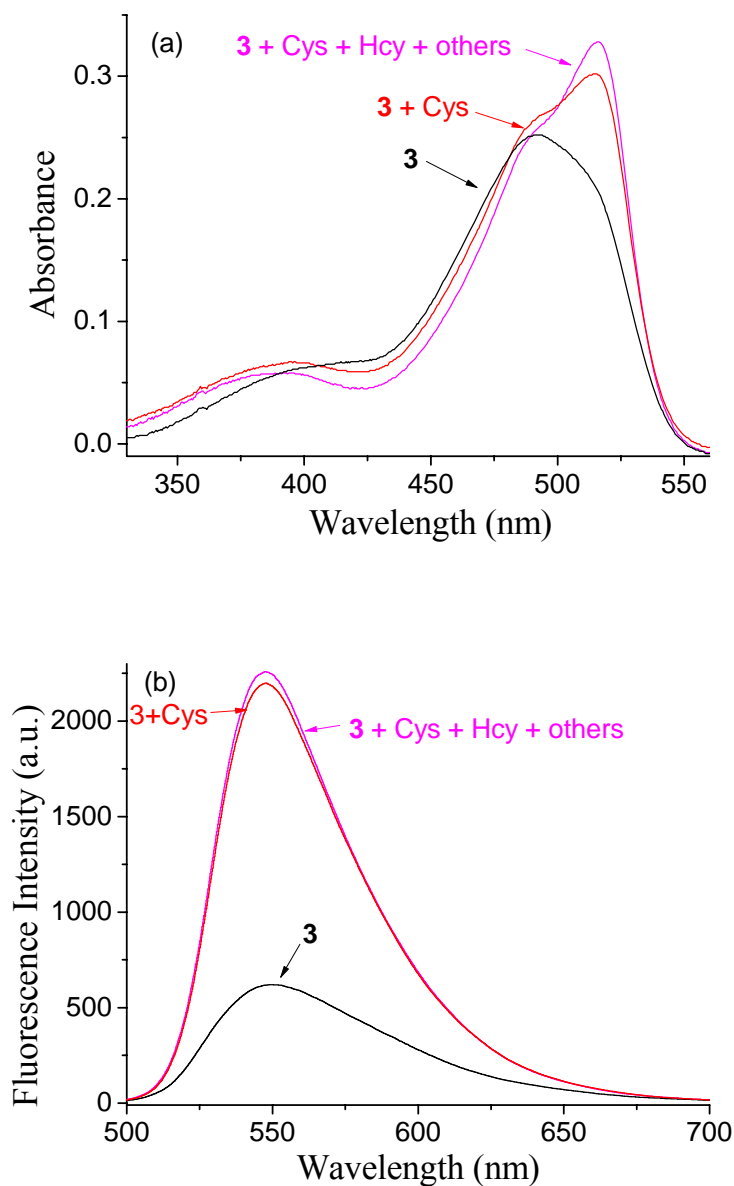

**Figure S3.** Absorption (a,  $1 \times 10^{-5}$  M) and fluorescence (b,  $1 \times 10^{-6}$  M,  $\lambda_{\text{ex}} = 480$  nm) spectra of BODIPY **3** in a MeOH/HEPES (45 mM, pH 7.2, 1:1, v/v) solution in the absence, or presence of 200 equiv of Cys or/and 400 equiv of other selected analytes containing 200 equiv of Hcy.

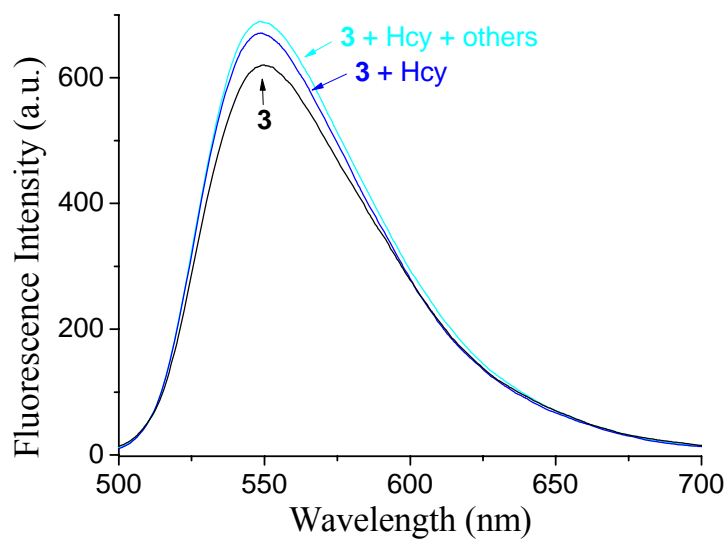

**Figure S4.** Fluorescence spectra of BODIPY **3** ( $1 \times 10^{-6}$  M) in a MeOH/HEPES (45 mM, pH 7.2, 1:1, v/v) solution in the absence, or presence of 200 equiv of Hcy or/and 400 equiv of other selected analytes.

### 3. Copies of $^1\text{H}$ NMR, $^{13}\text{C}$ NMR and High resolution mass spectra for all new compounds

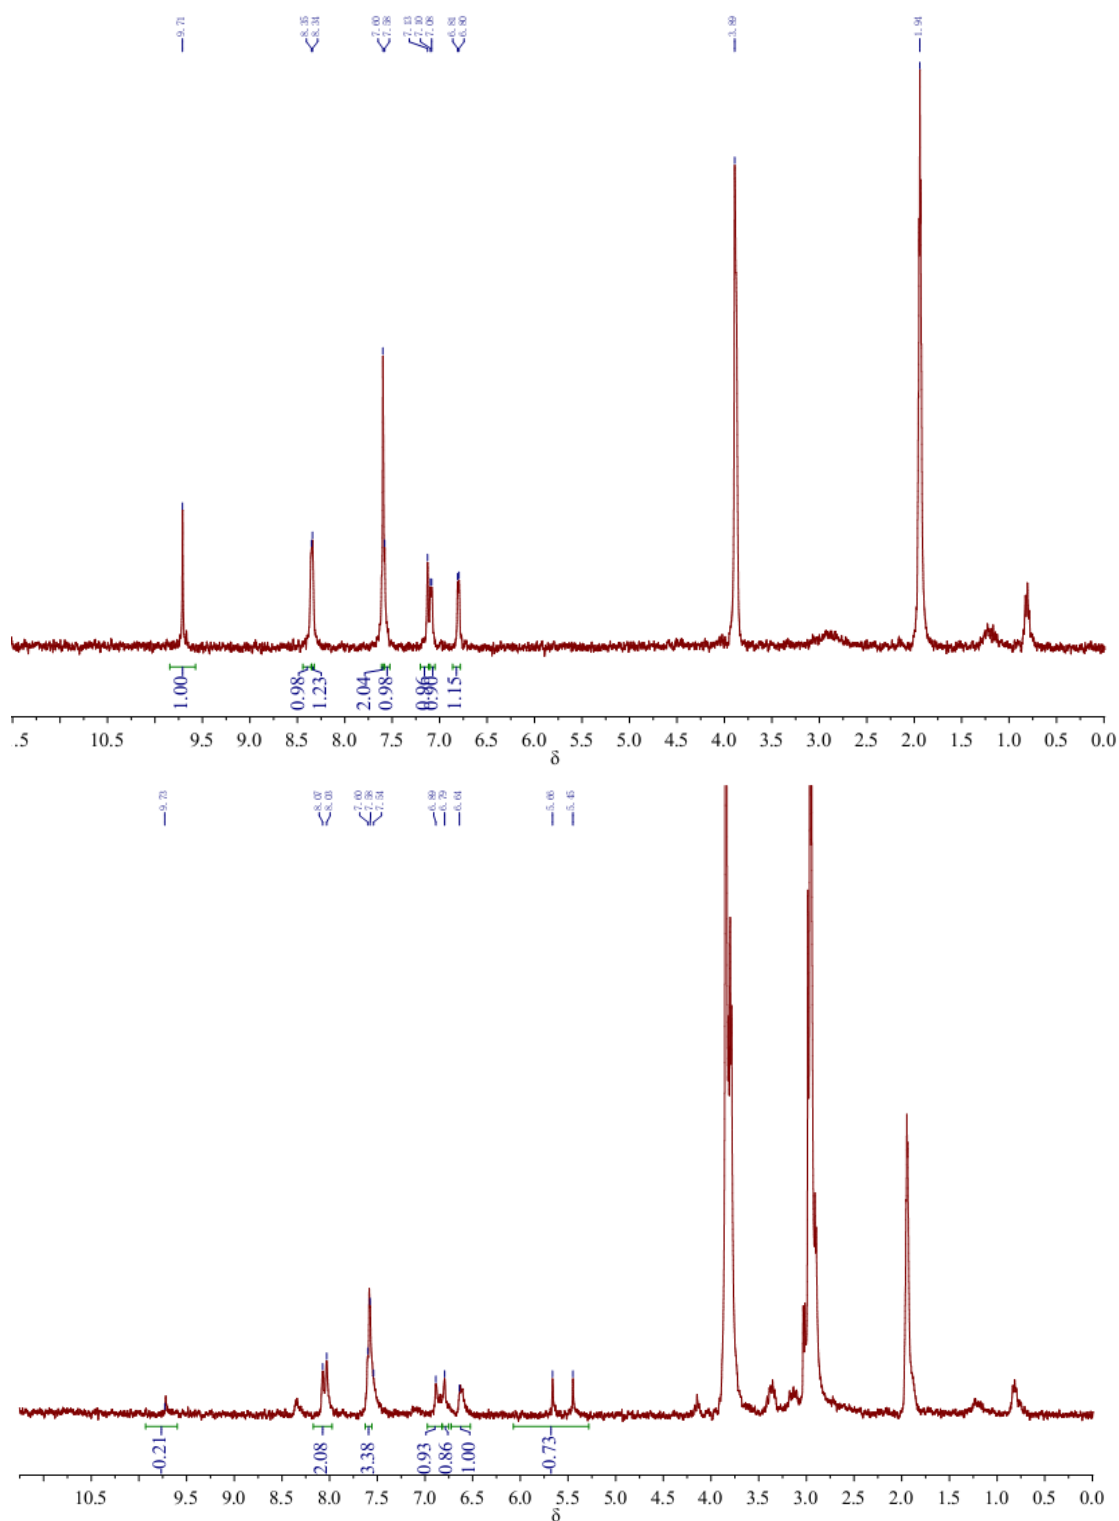

**Figure S5.**  $^1\text{H}$ -NMR spectra of BODIPY 1 (3 mM,  $\text{CD}_3\text{CN}:\text{D}_2\text{O}=7:3$ ) in the absence (top), or presence of 10 equiv of Cys (bottom, spectrum was recorded after addition of Cys for 1h).



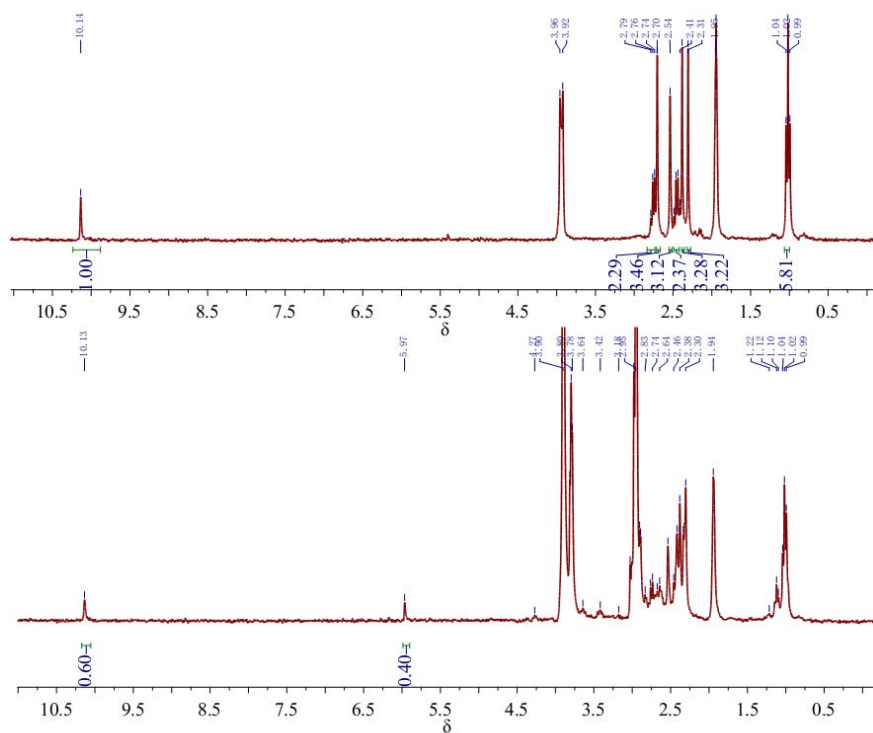

**Figure S6.** <sup>1</sup>H-NMR spectra of BODIPY **3** (3mM, CD<sub>3</sub>CN:D<sub>2</sub>O=7:3) in the absence (top), or presence of 10 equiv of Cys (bottom, spectrum was recorded after addition of Cys for 1h).

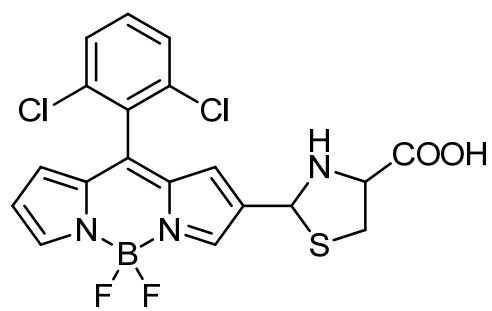

**5a**

Calcd. **C<sub>19</sub>H<sub>15</sub>BCl<sub>2</sub>F<sub>2</sub>N<sub>3</sub>O<sub>2</sub>S** [M+H]<sup>+</sup> 468.0323

Found: 468.0318

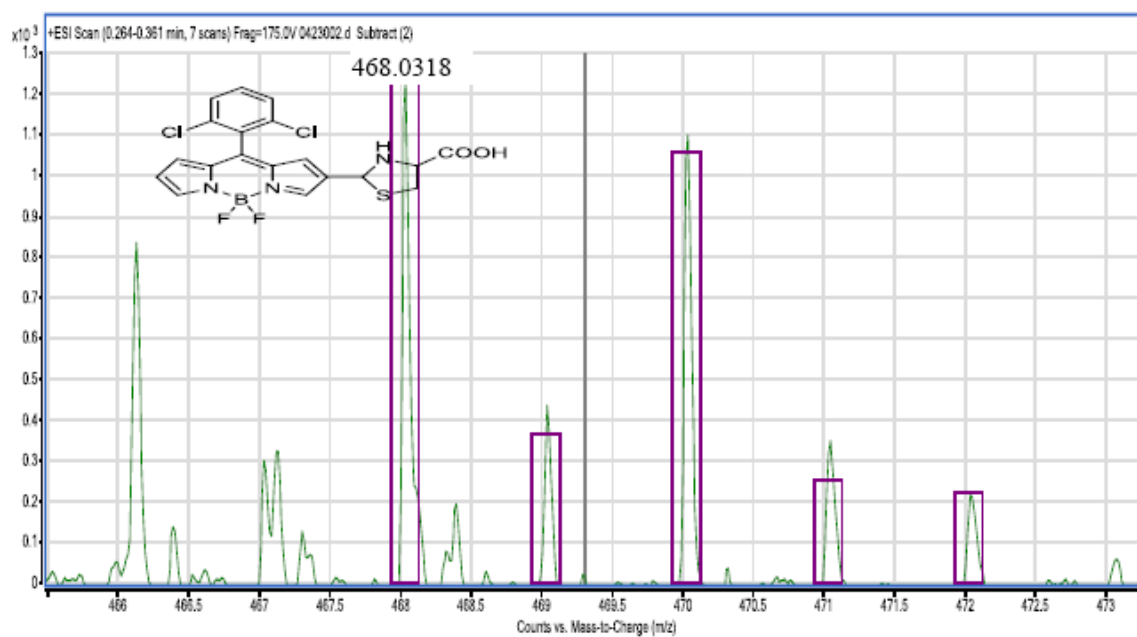

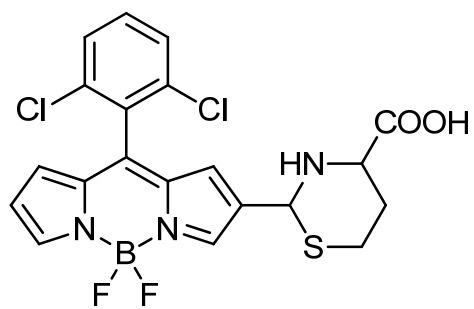

**5b**

Calcd. **C<sub>20</sub>H<sub>17</sub>BCl<sub>2</sub>F<sub>2</sub>N<sub>3</sub>O<sub>2</sub>S** [M+H]<sup>+</sup> 482.0480

Found: 482.0479

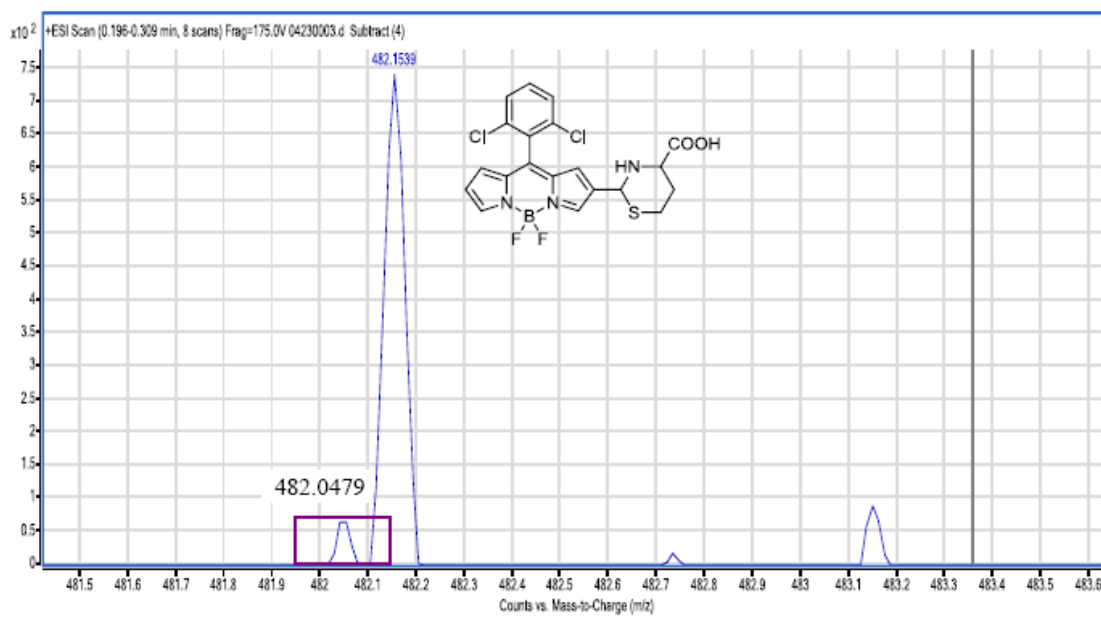

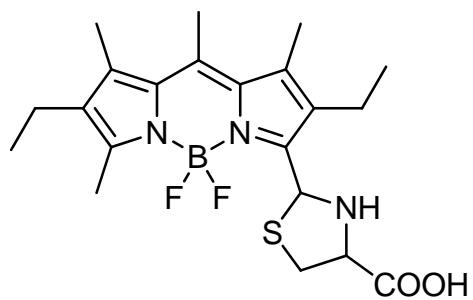

6

Calcd. **C<sub>21</sub>H<sub>29</sub>BF<sub>2</sub>N<sub>3</sub>O<sub>2</sub>S** [M+H]<sup>+</sup> 436.2042

Found: 436.2036

436.2036

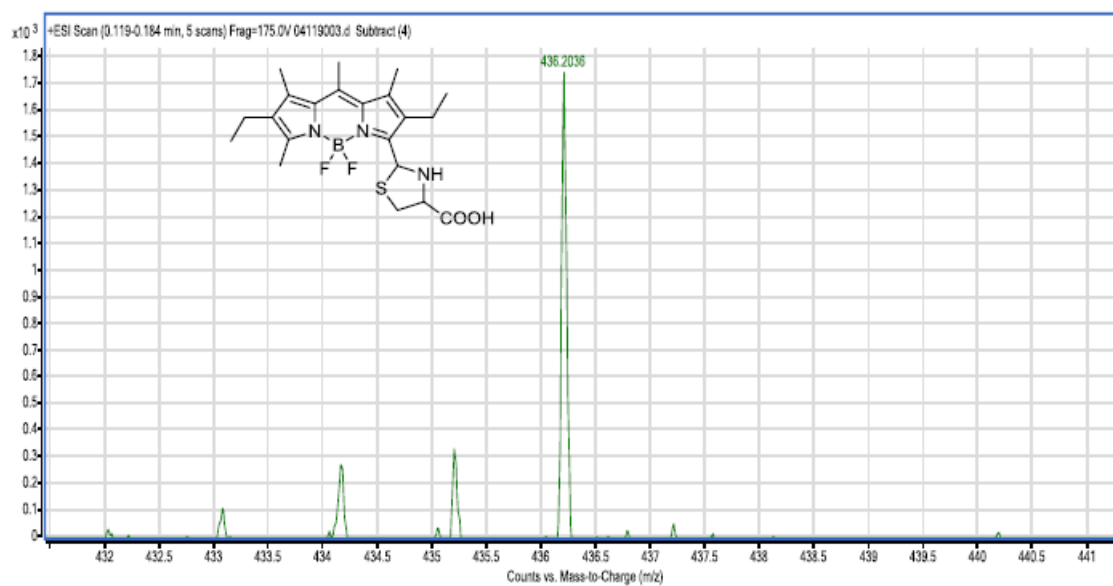

<sup>1</sup>H NMR of BODIPY 1 in CDCl<sub>3</sub>

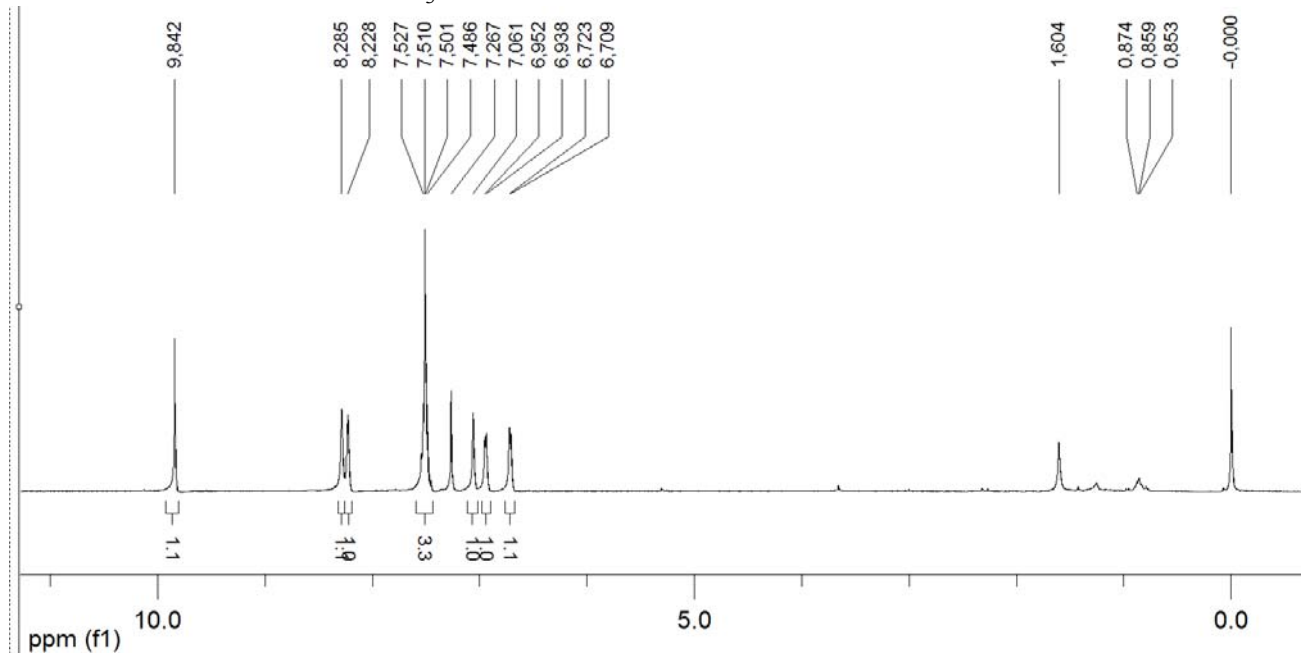

<sup>13</sup>C NMR of BODIPY 1 in CDCl<sub>3</sub>

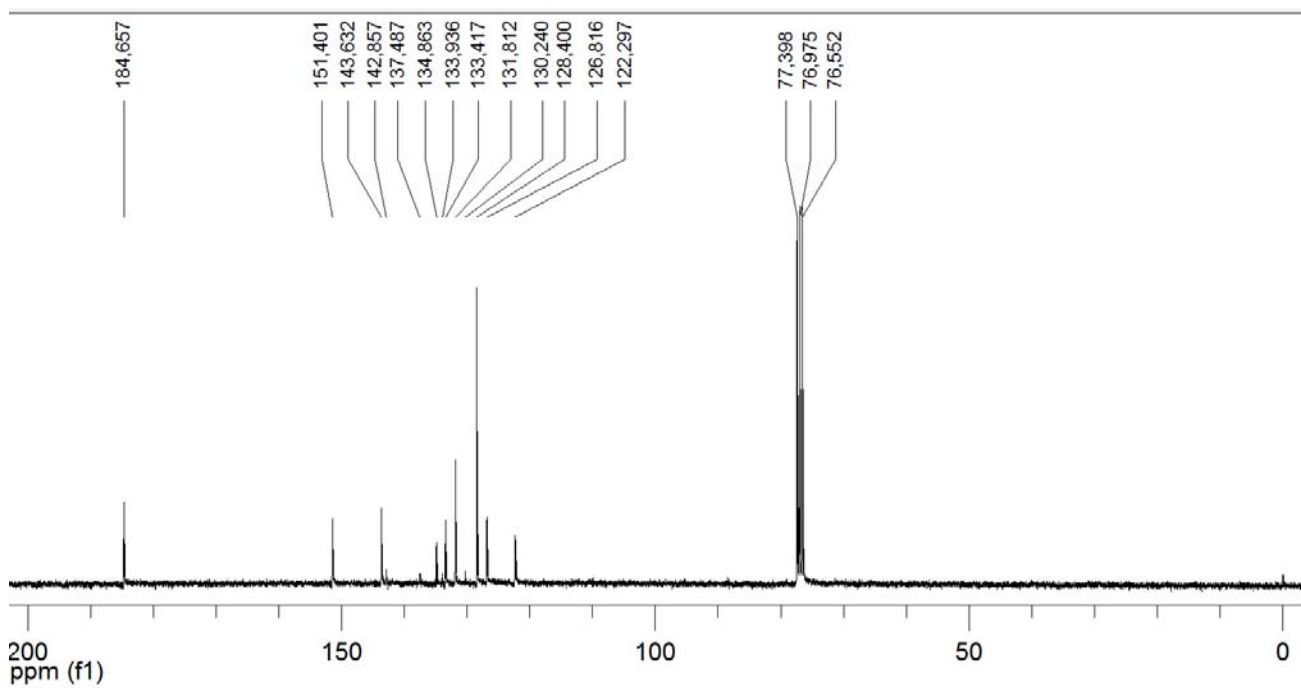

<sup>1</sup>H NMR of BODIPY 3 in CDCl<sub>3</sub>

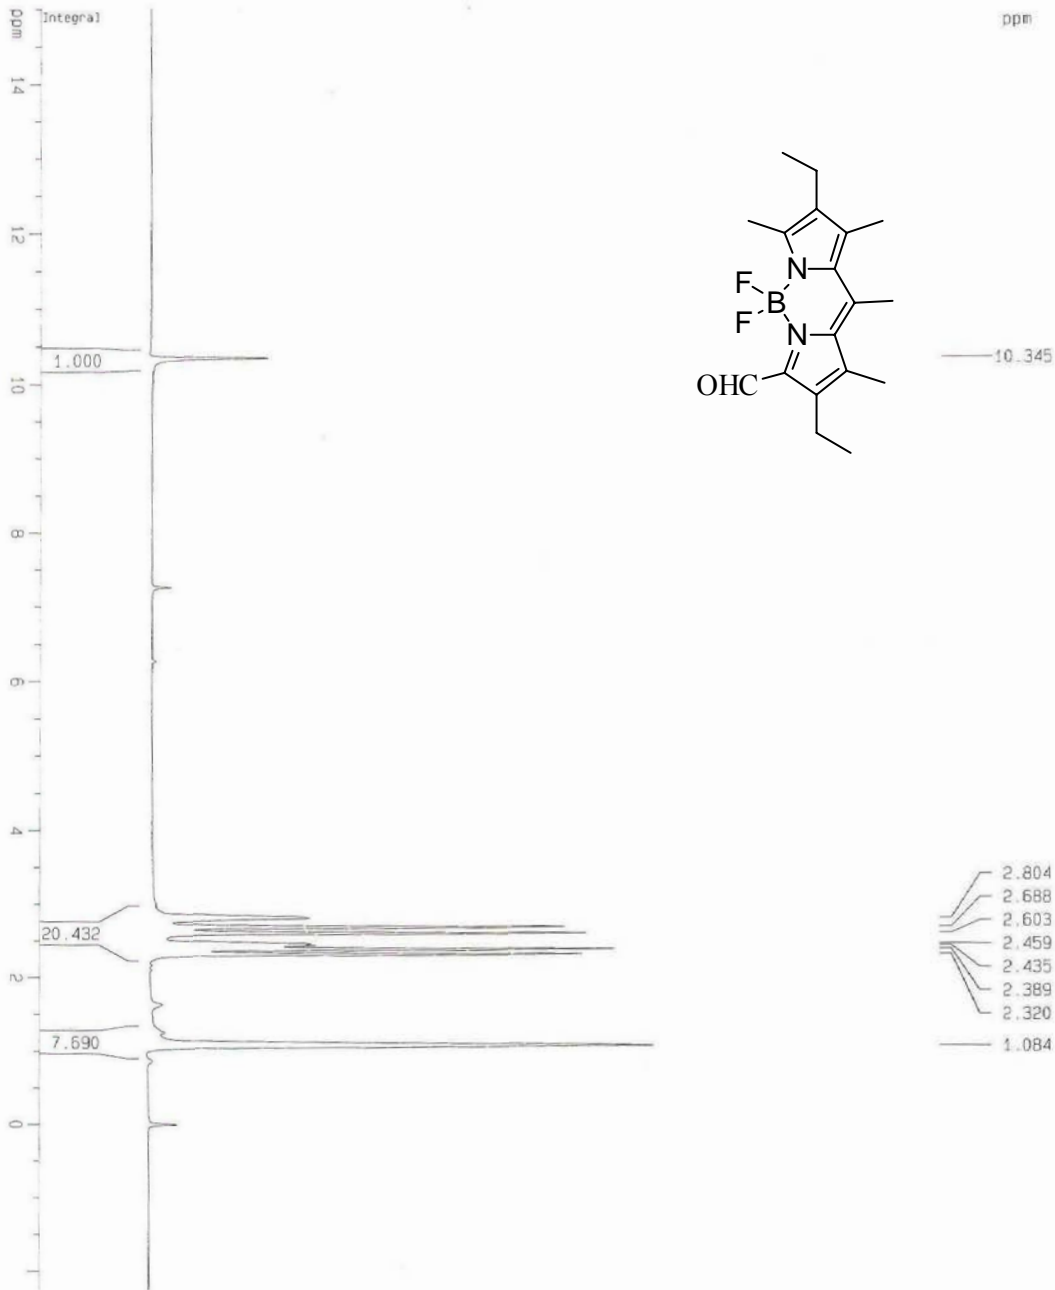

Current Data Parameters  
 NAME 2012-1-nh-H  
 EXPNO 110  
 PROCNO 1

F2 - Acquisition Parameters  
 Date\_ 20120324  
 Time 13:29  
 INSTRUM 5 mm BBO BB-5H  
 P1 8V300  
 PULPROG zg  
 TO 32768  
 SOLVENT CDCl3  
 NS 2  
 DS 2  
 SWH 11990.407 Hz  
 FIDRES 0.36918 Hz  
 AQ 1.3654756 sec  
 RG 181.3  
 DR 41.700 usec  
 DE 8.00 usec  
 TE 296.8 K  
 D1 3.00000000 sec  
 WREST 0.00000000 sec  
 WCNK 0.01500000 sec

\*\*\*\*\* CHANNEL f1 \*\*\*\*\*  
 NUC1 1H  
 P1 12.70 usec  
 PL -3.00 dB  
 SFO1 300.1318000 MHz

F2 - Processing parameters  
 SI 10284  
 SF 300.1360056 MHz  
 MDW EM  
 SSB 0  
 LB 1.00 Hz  
 GB 0  
 PC 1.00

10 MHz plot parameters  
 CX 22.00 cm  
 CY 0.00 cm  
 F1P 15.014 GHz  
 F1 4505.29 MHz  
 F2P -2.234 GHz  
 F2 -676.44 Hz  
 PPK0K 0.78492 GHz/cm  
 FZC0 235.57864 Hz/cm

*3006*

<sup>13</sup>C NMR of BODIPY 3 in CDCl<sub>3</sub>

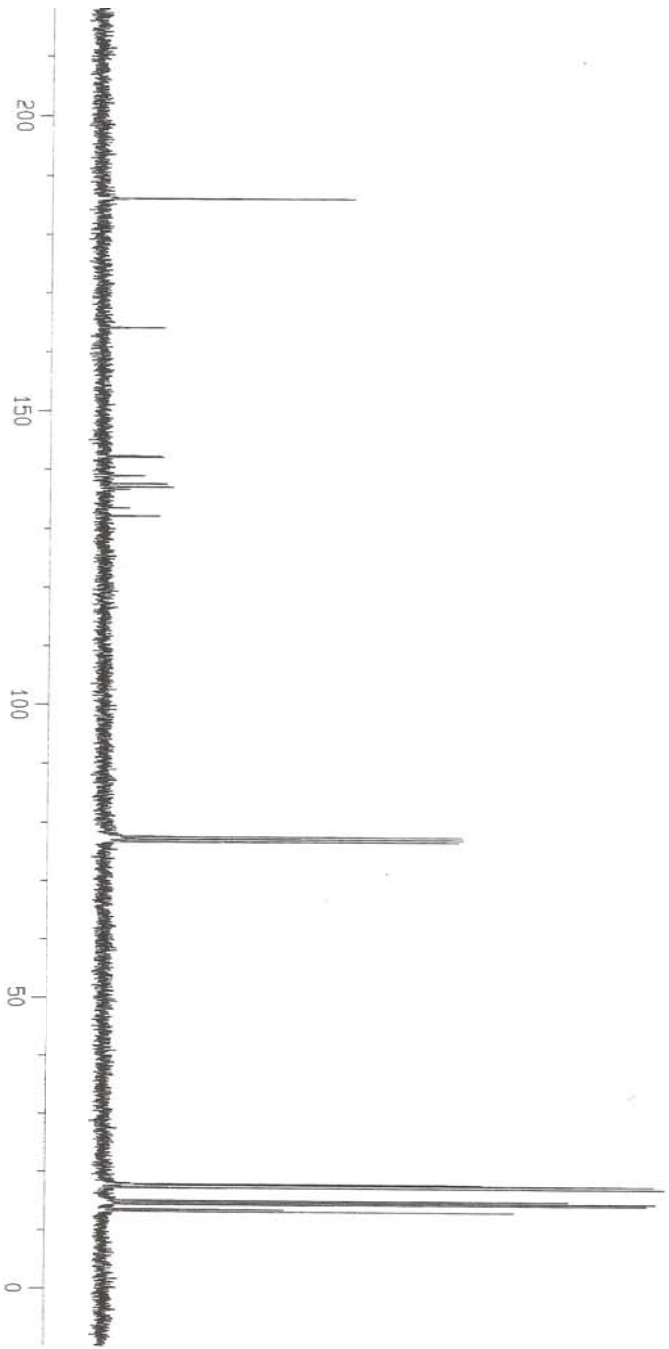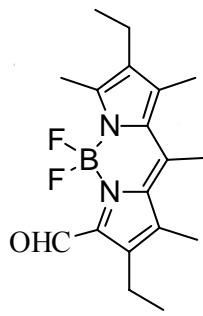

- 186.163
- 164.163
- 142.339
- 142.134
- 138.947
- 137.611
- 137.051
- 132.170
- 77.653
- 77.229
- 76.806
- 17.949
- 17.796
- 17.334
- 15.139
- 14.810
- 14.503
- 13.651
- 13.292

Current Data Parameters  
 NAME 2012-1-11-C  
 EXPNO 15  
 PROCNO 1

F2 - Acquisition Parameters  
 Date\_ 20120928  
 Time 15.36  
 INSTRUM av300  
 PROSD 5 mm BBO BB-1H  
 PULPROG zgpg30  
 TO 65536  
 SOLVENT CDCl3  
 NS 1000  
 DS 4  
 SWH 18115.941 Hz  
 FIDRES 0.276427 Hz  
 AQ 1.8089436 sec  
 RG 16384  
 DW 27.600 usec  
 DE 6.00 usec  
 TE 298.4 K  
 D1 2.00000000 sec  
 d11 0.03000000 sec  
 MCHEST 0.00000000 sec  
 MCMRK 0.01500000 sec

\*\*\*\*\* CHANNEL f1 \*\*\*\*\*  
 NUCL1 13C  
 P1 9.20 usec  
 PL1 -4.00 dB  
 SF01 75.4750505 MHz

\*\*\*\*\* CHANNEL f2 \*\*\*\*\*  
 CPDPRG2 waltz16  
 NUCL2 1H  
 PCPD2 80.00 usec  
 PL2 -3.00 dB  
 PL12 14.50 dB  
 SF02 300.1312005 MHz

F2 - Processing parameters:  
 SI 32768  
 SF 75.4677350 MHz  
 MDW EM  
 SSB 0  
 LB 1.00 Hz  
 GB 0  
 PC 1.40

1D NMR plot parameters:  
 CX 22.00 cm  
 CY 0.00 cm  
 F1P 230.210 ppm  
 F1 17373.46 Hz  
 F2P -742.48 Hz  
 PPMCK 10.91131 ppm/cm  
 HZCM 823.45197 Hz/cm

*Handwritten signature*

#### **4. DFT calculation**

The ground state geometry was optimized by using DFT method at b3lyp/6-31G (d) level. The same method was used for vibrational analysis to verify that the optimized structures correspond to local minima on the energy surface. TD-DFT computations were used to obtain the vertical excitation energies and oscillator strengths at the optimized ground state equilibrium geometries under the b3lyp/6-311G (2d,p) theoretical level. The TDDFT of all the molecules in Methanol were using the Self-Consistent Reaction Field (SCRF) method and th Polarizable Continuum Model (PCM). All of the calculations were carried out by the methods implemented in Gaussian 09 package.



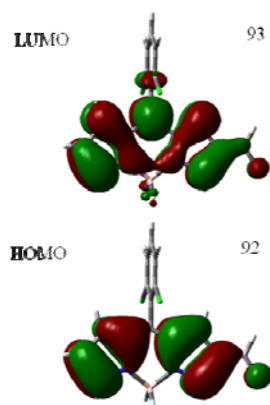

**Figure S7.** Frontier molecular orbitals (MO) of BODIPY **1** calculated with Time-dependent density functional theory (TDDFT) at the b3lyp/6-311G (2d,p) level (number of states: 20) using Gaussian 09.

Selected TDDFT paramete:

Excited State 1: Singlet-A 2.9435 eV 421.21 nm  $f = 0.5492$   $\langle S^{*2} \rangle = 0.000$

89 -> 93 -0.17021

92 -> 93 0.68566

92 <- 93 -0.10075

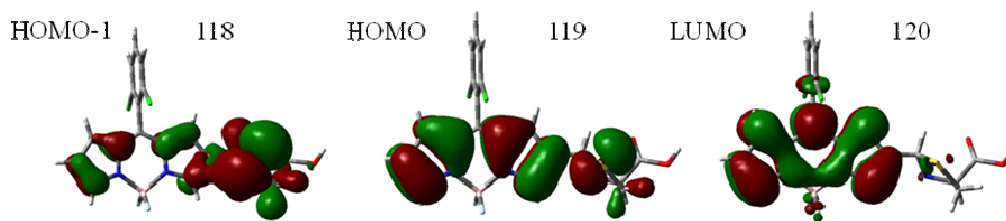

**Figure S8.** Frontier molecular orbitals (MO) of BODIPY **5a** calculated with Time-dependent density functional theory (TDDFT) at the b3lyp/6-311G (2d,p) level (number of states: 20) using Gaussian 09.

Selected TDDFT paramete:

Excited State 1: Singlet-A 2.6681 eV 464.70 nm  $f = 0.2787$   $\langle S^{*2} \rangle = 0.000$

118 ->120 0.38259

119 ->120 0.59010

Excited State 2: Singlet-A 2.9263 eV 423.69 nm  $f = 0.2783$   $\langle S^{*2} \rangle = 0.000$

115 ->120 0.12774

117 ->120 0.16171

118 ->120 0.57815

119 ->120 -0.35376

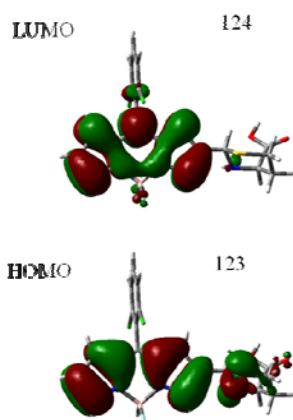

**Figure S9.** Frontier molecular orbitals (MO) of BODIPY **5b** calculated with Time-dependent density functional theory (TDDFT) at the b3lyp/6-311G (2d,p) level (number of states: 20) using Gaussian 09.

Selected TDDFT paramete:

|                  |           |           |           |            |                                  |
|------------------|-----------|-----------|-----------|------------|----------------------------------|
| Excited State 1: | Singlet-A | 2.6914 eV | 460.66 nm | f = 0.0461 | $\langle S^{*2} \rangle = 0.000$ |
|                  | 122 ->124 | 0.66859   |           |            |                                  |
|                  | 123 ->124 | 0.22784   |           |            |                                  |
| Excited State 2: | Singlet-A | 2.8103 eV | 441.18 nm | f = 0.4114 | $\langle S^{*2} \rangle = 0.000$ |
|                  | 119 ->124 | 0.13814   |           |            |                                  |
|                  | 121 ->124 | -0.27608  |           |            |                                  |
|                  | 122 ->124 | -0.21418  |           |            |                                  |
|                  | 123 ->124 | 0.60134   |           |            |                                  |

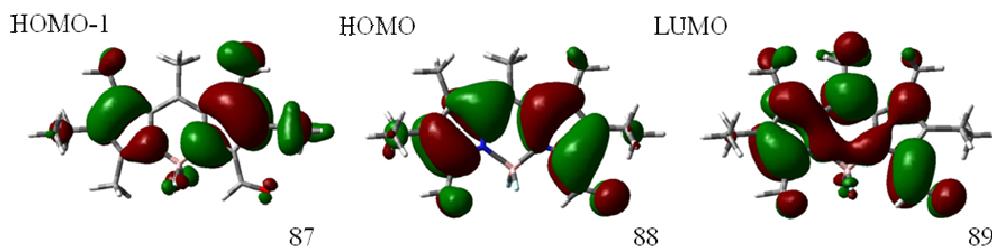

**Figure S10.** Frontier molecular orbitals (MO) of BODIPY **3** calculated with Time-dependent density functional theory (TDDFT) at the b3lyp/6-311G (2d,p) level (number of states: 20) using Gaussian 09.

Selected TDDFT paramete:

Excited State 1: Singlet-A 2.7186 eV 456.06 nm  $f = 0.5198$   $\langle S^{*2} \rangle = 0.000$

87 -> 89 -0.19827

88 -> 89 0.67968

Excited State 2: Singlet-A 3.0999 eV 399.96 nm  $f = 0.2050$   $\langle S^{*2} \rangle = 0.000$

85 -> 89 0.13580

87 -> 89 0.66059

88 -> 89 0.20155

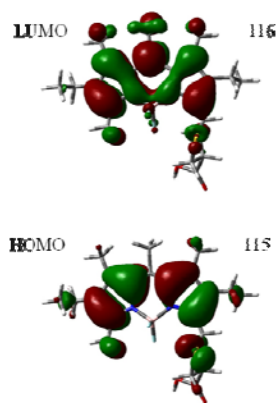

**Figure S11.** Frontier molecular orbitals (MO) of BODIPY **6** calculated with Time-dependent density functional theory (TDDFT) at the b3lyp/6-311G (2d,p) level (number of states: 20) using Gaussian 09.

Selected TDDFT paramete:

Excited State 1: Singlet-A 2.7295 eV 454.23 nm  $f = 0.4993$   $\langle S^{*2} \rangle = 0.000$

113 ->116 -0.13637

114 ->116 -0.15397

115 ->116 0.67799

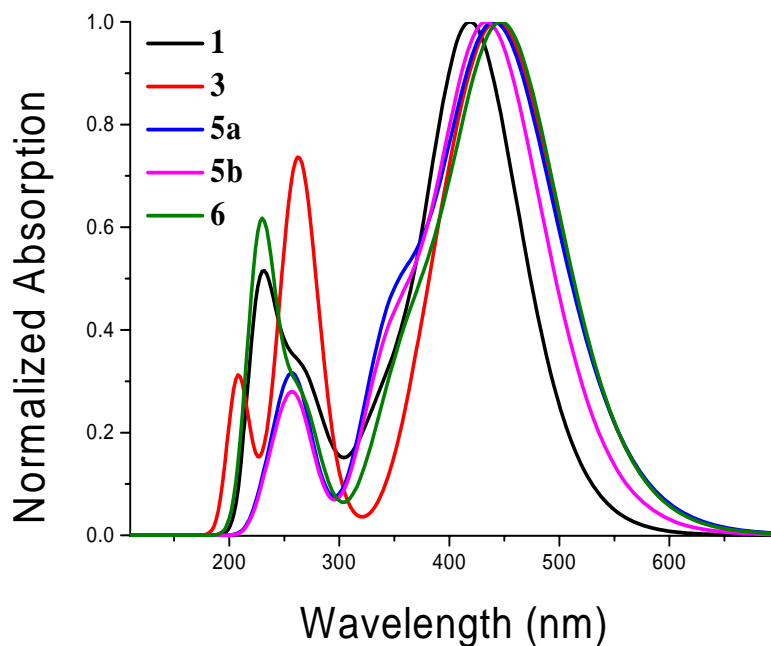

**Figure S12.** DFT calculated absorption spectra of **1**, **3**, **5a**, **5b** and **6** in Methanol.

**DFT optimized coordinates for BODIPY 1, 3, 5a, 5b and 6.**

Compound **1**

|   |             |             |             |
|---|-------------|-------------|-------------|
| B | 2.46534800  | 1.45569400  | 0.08911300  |
| C | 0.97526900  | 3.56055500  | -0.20146200 |
| C | -0.39393500 | 3.91611900  | -0.25287300 |
| C | -1.11378700 | 2.73739000  | -0.16576300 |
| C | -0.16832200 | 1.67722300  | -0.06594000 |
| C | -0.34641000 | 0.29631900  | -0.00155900 |
| C | 0.75895300  | -0.56999900 | 0.02171300  |
| C | 0.82992500  | -1.97868400 | 0.01728700  |
| C | 2.18512100  | -2.32091900 | -0.01069400 |
| C | 2.90749200  | -1.09881700 | -0.01874900 |
| F | 2.99717800  | 1.72432100  | 1.33251000  |

|    |             |             |             |
|----|-------------|-------------|-------------|
| F  | 3.33337300  | 1.77521200  | -0.93074200 |
| N  | 1.11099500  | 2.23564200  | -0.08962500 |
| N  | 2.06522900  | -0.06667300 | 0.00236400  |
| C  | -1.72721000 | -0.27460300 | 0.01817100  |
| C  | -2.40325900 | -0.51437000 | 1.22757700  |
| C  | -2.40778100 | -0.59894700 | -1.16865200 |
| C  | -3.68983300 | -1.05015100 | 1.25947200  |
| C  | -3.69453100 | -1.13531100 | -1.15761200 |
| C  | -4.33022100 | -1.35858000 | 0.06155100  |
| H  | -4.17501600 | -1.21959000 | 2.21405700  |
| H  | -4.18347900 | -1.37179900 | -2.09587800 |
| H  | -5.33244100 | -1.77610300 | 0.07816000  |
| H  | -2.18808500 | 2.61599500  | -0.18044600 |
| H  | -0.78148900 | 4.92088800  | -0.34770300 |
| H  | 1.84748700  | 4.19992800  | -0.23870900 |
| H  | 3.97932200  | -0.95651200 | -0.03585000 |
| H  | -0.01479900 | -2.65459000 | 0.02242900  |
| C  | 2.77211700  | -3.65952600 | -0.03516700 |
| H  | 2.03500100  | -4.49210700 | -0.02115700 |
| O  | 3.96956400  | -3.88372200 | -0.06815900 |
| Cl | -1.63513000 | -0.33048300 | -2.71978800 |
| Cl | -1.62368100 | -0.13537500 | 2.75131200  |

### Compound 3

|   |            |             |            |
|---|------------|-------------|------------|
| B | 0.06083400 | -1.40626800 | 0.16520900 |
| C | 2.58788300 | -1.02500100 | 0.23831900 |

|   |             |             |             |
|---|-------------|-------------|-------------|
| C | 3.52940300  | 0.04452400  | 0.26723100  |
| C | 2.80750200  | 1.22376400  | 0.22207000  |
| C | 1.41417400  | 0.85815400  | 0.17961300  |
| C | 2.85503300  | -2.49231800 | 0.24566000  |
| C | 5.01926800  | -0.13406400 | 0.27586200  |
| C | 5.58294600  | -0.38508500 | -1.12760000 |
| C | 3.41819300  | 2.59186300  | 0.15870300  |
| C | 0.24694600  | 1.60686400  | 0.11191900  |
| C | -1.01462200 | 0.96770900  | -0.04756000 |
| C | -2.32218400 | 1.50558300  | -0.23515600 |
| C | -3.19206600 | 0.41908300  | -0.35807700 |
| C | -2.40247200 | -0.74053300 | -0.23038800 |
| C | 0.29285900  | 3.10556200  | 0.20761000  |
| C | -2.74390700 | 2.94289600  | -0.31908300 |
| C | -4.68048500 | 0.44004500  | -0.55089000 |
| C | -5.06278790 | 0.45493681  | -2.03463930 |
| C | -2.83895200 | -2.14714700 | -0.25835400 |
| F | -0.09244300 | -2.05923100 | 1.37274200  |
| F | 0.13356700  | -2.31019700 | -0.88031400 |
| N | 1.35468000  | -0.53609200 | 0.18086400  |
| N | -1.10578700 | -0.40446500 | -0.06429000 |
| H | 2.18692400  | -2.99309200 | 0.95125600  |
| H | 3.89256200  | -2.69670300 | 0.51620200  |
| H | 2.65428500  | -2.91382900 | -0.74426000 |
| H | 5.49704800  | 0.74711000  | 0.71602800  |
| H | 5.28230700  | -0.97287500 | 0.93076600  |



|   |             |             |             |
|---|-------------|-------------|-------------|
| H | 5.13743000  | -1.28226700 | -1.56953900 |
| H | 6.66794600  | -0.52064100 | -1.10005600 |
| H | 5.35636300  | 0.45637300  | -1.78971900 |
| H | 4.49233800  | 2.51429300  | -0.02384800 |
| H | 3.28419400  | 3.14830300  | 1.09333400  |
| H | 2.98985300  | 3.19029900  | -0.65028500 |
| H | 1.20951500  | 3.45079500  | 0.67787400  |
| H | -0.54517700 | 3.47282900  | 0.80022100  |
| H | 0.22000700  | 3.56344000  | -0.78632200 |
| H | -3.78013800 | 3.00788700  | -0.65725500 |
| H | -2.13219000 | 3.51840800  | -1.01950000 |
| H | -2.69321100 | 3.44422500  | 0.65442000  |
| H | -5.12980348 | -0.42952729 | -0.05896530 |
| H | -5.09149450 | 1.33096041  | -0.07001547 |
| H | -4.66304321 | 1.35424286  | -2.51050381 |
| H | -6.14973860 | 0.45633363  | -2.15769631 |
| H | -4.65749823 | -0.42112408 | -2.55153171 |
| H | -2.03860200 | -2.90542800 | -0.26207100 |
| O | -4.01103700 | -2.46377600 | -0.28204300 |

Compound **5a**

|   |            |            |             |
|---|------------|------------|-------------|
| B | 0.98341800 | 2.91751600 | -0.24859200 |
| C | 3.54915700 | 3.24062000 | -0.01003100 |
| C | 4.72597600 | 2.46567400 | 0.06673700  |
| C | 4.32851700 | 1.13587700 | 0.05375800  |
| C | 2.91116600 | 1.12622100 | -0.02798700 |
| C | 1.99747400 | 0.06484900 | -0.02996000 |

|   |             |             |             |
|---|-------------|-------------|-------------|
| C | 0.62124700  | 0.30506300  | -0.05052200 |
| C | -0.48497700 | -0.58404200 | -0.00769000 |
| C | -1.63784600 | 0.18985200  | -0.00752100 |
| C | -1.20906100 | 1.54205900  | -0.05358000 |
| F | 0.80414600  | 3.43226400  | -1.51847500 |
| F | 0.64835800  | 3.83165700  | 0.72823800  |
| N | 2.47010200  | 2.44737400  | -0.06732700 |
| N | 0.12382400  | 1.60925700  | -0.08407400 |
| C | 2.50028200  | -1.34155300 | 0.01391100  |
| C | 2.73039000  | -2.00525200 | 1.23202700  |
| C | 2.76631700  | -2.06339000 | -1.16295100 |
| C | 3.20172800  | -3.31644000 | 1.28172600  |
| C | 3.23787100  | -3.37500600 | -1.13511600 |
| C | 3.45392000  | -3.99635000 | 0.09260400  |
| H | 3.36512600  | -3.78970600 | 2.24333800  |
| H | 3.43001100  | -3.89418400 | -2.06727500 |
| H | 3.82085300  | -5.01793500 | 0.12284000  |
| H | 4.95775800  | 0.25807100  | 0.10670600  |
| H | 5.73403700  | 2.85161900  | 0.12882900  |
| H | 3.43896400  | 4.31678300  | -0.02687400 |
| H | -1.81674500 | 2.43553500  | -0.07717000 |
| H | -0.42196500 | -1.66364200 | 0.02575200  |
| C | -3.05392600 | -0.28101900 | 0.04164800  |
| H | -3.09439700 | -1.34855200 | -0.20653900 |
| N | -3.92205300 | 0.53526400  | -0.82000300 |
| H | -3.79869000 | 0.23721900  | -1.78721000 |

|    |             |             |             |
|----|-------------|-------------|-------------|
| S  | -3.82336900 | -0.11768300 | 1.75050300  |
| C  | -5.31298600 | 0.41023600  | -0.41913000 |
| H  | -5.91200500 | 1.16742800  | -0.94485300 |
| C  | -5.33499100 | 0.70011500  | 1.08869200  |
| H  | -5.28210000 | 1.77700900  | 1.26229500  |
| H  | -6.22367600 | 0.29497000  | 1.57408400  |
| C  | -5.92224800 | -0.95109200 | -0.78469300 |
| O  | -5.38975800 | -1.77324800 | -1.49739500 |
| O  | -7.16055800 | -1.11573000 | -0.26688400 |
| H  | -7.47575200 | -1.98780900 | -0.57274500 |
| Cl | 2.50458600  | -1.31114400 | -2.72543400 |
| Cl | 2.42213200  | -1.17984000 | 2.74828200  |

Compound **5b**

|   |             |             |             |
|---|-------------|-------------|-------------|
| B | 1.21206000  | 2.92873100  | -0.37048300 |
| C | 3.79503500  | 3.15609800  | -0.21244300 |
| C | 4.94261800  | 2.33686500  | -0.13177100 |
| C | 4.49239300  | 1.02632900  | -0.07123600 |
| C | 3.07297600  | 1.07167600  | -0.11305400 |
| C | 2.11840100  | 0.05208700  | -0.03391100 |
| C | 0.75169000  | 0.35057800  | -0.02015500 |
| C | -0.38450500 | -0.48847500 | 0.11190500  |
| C | -1.50516800 | 0.33286500  | 0.11713900  |
| C | -1.02620300 | 1.66195700  | -0.01109800 |
| F | 1.01618300  | 3.36948400  | -1.66567100 |
| F | 0.94784000  | 3.91548900  | 0.55507200  |

|   |             |             |             |
|---|-------------|-------------|-------------|
| N | 2.68454500  | 2.40730500  | -0.20284300 |
| N | 0.30751900  | 1.67070100  | -0.09928500 |
| C | 2.56372400  | -1.37076700 | 0.06576900  |
| C | 2.79899500  | -1.98422600 | 1.30903300  |
| C | 2.76738100  | -2.15857400 | -1.08068400 |
| C | 3.21485200  | -3.31116400 | 1.41080600  |
| C | 3.18359600  | -3.48664400 | -1.00060200 |
| C | 3.40576800  | -4.05746100 | 0.25040600  |
| H | 3.38411700  | -3.74466100 | 2.39001700  |
| H | 3.32906300  | -4.05752500 | -1.91075100 |
| H | 3.73000500  | -5.09139400 | 0.32142200  |
| H | 5.08699500  | 0.12653800  | 0.00679300  |
| H | 5.96653100  | 2.68367800  | -0.11482400 |
| H | 3.72786800  | 4.23406600  | -0.27642900 |
| H | -1.59817900 | 2.57864200  | -0.04596600 |
| H | -0.36354400 | -1.56611300 | 0.20334100  |
| C | -2.94134900 | -0.06406700 | 0.25803900  |
| H | -3.03181800 | -1.15062000 | 0.09789400  |
| N | -3.76537100 | 0.71395000  | -0.66865000 |
| H | -3.36470500 | 0.62463700  | -1.60077100 |
| S | -3.46824500 | 0.25133700  | 2.01084100  |
| C | -5.18426200 | 0.36093500  | -0.70880100 |
| C | -5.24558800 | -0.16515000 | 1.79294300  |
| H | -5.35630700 | -1.24460000 | 1.64088100  |
| H | -5.73053600 | 0.08590600  | 2.74098500  |
| C | -5.87808800 | 0.61384900  | 0.63894700  |

|    |             |             |             |
|----|-------------|-------------|-------------|
| H  | -6.93092800 | 0.32815200  | 0.54490100  |
| H  | -5.82590700 | 1.68670000  | 0.84742100  |
| H  | -5.64515500 | 1.02828300  | -1.45137400 |
| C  | -5.49010900 | -1.05734600 | -1.22931400 |
| O  | -6.45101900 | -1.73088600 | -0.93124800 |
| O  | -4.56803000 | -1.47061500 | -2.13698000 |
| H  | -4.86513400 | -2.34773300 | -2.44565100 |
| Cl | 2.56974600  | -1.07364000 | 2.78954500  |
| Cl | 2.49470500  | -1.47057300 | -2.67094200 |

#### Compound 6

|   |             |             |             |
|---|-------------|-------------|-------------|
| B | -0.40162019 | 0.19201403  | -0.11235067 |
| C | -2.68704200 | -0.82386889 | -0.92770282 |
| C | -3.97473529 | -0.31783553 | -1.22413159 |
| C | -3.94481286 | 1.08793766  | -1.13026172 |
| C | -2.63587596 | 1.44440704  | -0.81768369 |
| C | -2.27576555 | -2.30715627 | -0.94050908 |
| C | -5.20609211 | -1.16753269 | -1.58971704 |
| C | -5.96277552 | -1.55178111 | -0.30519735 |
| C | -5.13016071 | 2.04828797  | -1.34422245 |
| C | -2.06645785 | 2.72895369  | -0.72241413 |
| C | -0.66439962 | 2.79071528  | -0.60086047 |
| C | 0.17449478  | 3.89976510  | -0.68252256 |
| C | 1.49862721  | 3.41937729  | -0.60645887 |
| C | 1.46559700  | 2.01242101  | -0.44962970 |
| C | -2.92959516 | 4.00307273  | -0.78576028 |

|   |             |             |             |
|---|-------------|-------------|-------------|
| C | -0.26123513 | 5.36919355  | -0.83957102 |
| C | 2.77270730  | 4.28312505  | -0.68162522 |
| C | 3.17733516  | 4.72777508  | 0.73645287  |
| F | 0.38290697  | -0.84406092 | -0.77672502 |
| F | -0.39830208 | -0.05481027 | 1.32710376  |
| N | -1.89028075 | 0.20704228  | -0.62256098 |
| N | 0.18579392  | 1.62586663  | -0.38663314 |
| H | -1.91971666 | -2.57009171 | -1.91462446 |
| H | -3.12199902 | -2.91443568 | -0.69460330 |
| H | -1.50028950 | -2.46840634 | -0.22151725 |
| H | -5.85224963 | -0.60401420 | -2.23019933 |
| H | -4.88870427 | -2.05539445 | -2.09535474 |
| H | -5.31543145 | -2.11473628 | 0.33418076  |
| H | -6.81745422 | -2.14382274 | -0.55806776 |
| H | -6.28084779 | -0.66449623 | 0.20092736  |
| H | -5.81830454 | 1.61694663  | -2.04094199 |
| H | -4.76980918 | 2.97943693  | -1.72917901 |
| H | -5.62596523 | 2.21626201  | -0.41091464 |
| H | -3.89694654 | 3.79955179  | -0.37674116 |
| H | -3.03143588 | 4.31492029  | -1.80450251 |
| H | -2.45944123 | 4.78059756  | -0.22044073 |
| H | 0.48927722  | 5.90815850  | -1.37936244 |
| H | -0.38987279 | 5.80885004  | 0.12738602  |
| H | -1.18603044 | 5.41130465  | -1.37638639 |
| H | 3.56672636  | 3.71158726  | -1.11557514 |
| H | 2.58293906  | 5.14593571  | -1.28592768 |

|   |            |             |             |
|---|------------|-------------|-------------|
| H | 2.38300169 | 5.29639793  | 1.17282577  |
| H | 4.05965754 | 5.33076668  | 0.68236323  |
| H | 3.37139544 | 3.86530431  | 1.33951457  |
| C | 2.69004986 | 1.08210904  | -0.35558096 |
| H | 2.97081288 | 0.77463463  | -1.34094405 |
| N | 3.88098740 | 1.72991695  | 0.28307230  |
| H | 4.71936424 | 1.28441671  | -0.03161648 |
| S | 2.25181400 | -0.27690803 | 0.71778068  |
| C | 3.78814349 | 1.45379984  | 1.72349095  |
| H | 2.92241404 | 1.91524336  | 2.15205456  |
| C | 3.66283202 | -0.08314856 | 1.73324290  |
| H | 3.53142960 | -0.49918720 | 2.71049378  |
| H | 4.52876943 | -0.53414302 | 1.29392061  |
| C | 5.02576980 | 1.94620776  | 2.49568171  |
| O | 4.87249915 | 2.52239905  | 3.79575900  |
| H | 4.92898226 | 1.83155223  | 4.46040000  |
| O | 6.17130240 | 1.84131901  | 1.98389238  |
